1 **Molecular characterization of *Fasciola gigantica* in Punjab, Pakistan to infer the**  
2 **dispersal route among the neighbouring countries of the Indian subcontinent**

3

4 Zia Ur Rehman<sup>a</sup>, Atsushi Tashibu<sup>b</sup>, Michiyo Tashiro<sup>b</sup>, Imran Rashid<sup>1a\*</sup>, Qasim Ali<sup>d</sup>, Osama  
5 Zahid<sup>c</sup>, Kamran Ashraf<sup>a</sup>, Wasim Shehzad<sup>a</sup>, Umer Chaudhry<sup>c\*</sup>, Madoka Ichikawa-Seki<sup>b\*</sup>

6

7 <sup>a</sup> *Department of Parasitology, University of Veterinary and Animal Sciences, Lahore, 54200,*  
8 *Pakistan*

9

10 <sup>b</sup> *Laboratory of Veterinary Parasitology, Faculty of Agriculture, Iwate University, 3-18-8*  
11 *Ueda, Morioka 020-8550, Japan*

12

13 <sup>c</sup> *Roslin Institute, University of Edinburgh, Midlothian, Scotland, EH25 9RG, United*  
14 *Kingdom*

15

16 <sup>d</sup> *Department of Parasitology, Gomal University Dera Ismail Khan, Khyber Pakhtoon Khah,*  
17 *Pakistan*

18

19

20 \*Corresponding authors:

21 Imran Rashid

22 Tel : +92 42 99 213 697

23 E-mail: [imran.rashid@uvas.edu.pk](mailto:imran.rashid@uvas.edu.pk)

24

25 Madoka Ichikawa-Seki

26 Tel.: +81 19 621 6218

27 E-mail: [madoka@iwate-u.ac.jp](mailto:madoka@iwate-u.ac.jp)

28

29 Umer Chaudhry

30 Email: [uchaudhr@exseed.ed.ac.uk](mailto:uchaudhr@exseed.ed.ac.uk)

31

32 **Abstract**

33 *Fasciola gigantica* is considered to be a major pathogen causing fasciolosis in the Indian  
34 subcontinent, resulting in millions of dollars production losses to the livestock industry. To  
35 understand the dispersal origin and the spread patterns of *F. gigantica* is important for  
36 preventing the disease. A total of 53 *Fasciola* flukes collected from buffalo and goat in the  
37 Punjab province of Pakistan, were identified as *F. gigantica* based on the multiplex PCR for  
38 the phosphoenolpyruvate carboxykinase (*pepck*) and the PCR-restriction fragment length  
39 polymorphism (RFLP) for DNA polymerase delta (*pold*). A significant genetic difference  
40 between *F. gigantica* from buffalo and goats in Pakistan was indicated by the genetic analysis  
41 of two distinct mitochondrial markers [NADH dehydrogenase subunit 1 (*nad1*) and  
42 cytochrome C oxidase subunit 1 (*cox1*)]. Phylogenetic analysis of the seventeen *nad1*  
43 haplotypes of *F. gigantica* from Pakistan with those in neighbouring countries of the Indian  
44 subcontinent revealed that all the haplotypes were clustered in haplogroup A. *Fasciola*  
45 *gigantica* with the eight haplotypes might be expanded in Pakistan from Indian origin, along  
46 with the migration of the domestic animals, since they were related to Indian haplotypes. In  
47 contrast, the remaining nine haplotypes were not shared with any neighbouring countries,  
48 suggesting independent origin, or possibly come from neighbouring Middle East countries.  
49 Our study provides a proof of concept for a method that could be used to investigate the  
50 epidemiology of *F. gigantica* regarding the development of sustainable parasite control  
51 strategies.

52

53 **Key words:** *Fasciola gigantica*, *pepck*, *pold*, *nad1*, *cox1*.

54

## 55 **1. Introduction**

56 Fasciolosis, caused by the liver fluke of genus *Fasciola*, is a neglected zoonotic disease  
57 that results in a severe economic losses in the livestock industry (Aghayan et al., 2019).  
58 Fasciolosis is one of the most widely spread diseases reported from over 50 countries mostly  
59 in Asia, Africa and America (Mas-Coma, 2003; Mas-Coma et al., 2005; Toledo and Fried,  
60 2014). The incidents of fasciolosis have increased over the past two decades, possibly  
61 because of the changes in farming practices, development of anthelmintic resistance and  
62 climatic changes (Sabourin et al., 2018). The genus *Fasciola* comprises of two important  
63 species. *Fasciola hepatica* is found in temperate zones, whereas *F. gigantica* is generally  
64 considered to be a parasite of tropical areas (Mas-Coma et al., 2009). Both species co-exist in  
65 subtropics, which can result in the formation of intermediate or hybrid forms mainly in Asian  
66 countries (Ichikawa and Itagaki, 2010b; Rokni et al., 2010). *Fasciola* infects the livers and  
67 bile ducts of ruminants and other mammals, while the snails of Lymnaeidae family act as  
68 their intermediate hosts (Toledo and Fried, 2014; Usip et al., 2014).

69 Mitochondrial markers have been used for the phylogenetic characterizations of *Fasciola*  
70 species to examine the propagation route of this group of parasites in many countries (Ai et  
71 al., 2011; Elliott et al., 2014; Ichikawa-Seki et al., 2017; Ichikawa and Itagaki, 2012;  
72 Semyenova et al., 2006; Thang et al., 2019). In the Asian subcontinent, *F. gigantica* has been  
73 divided into three haplogroups. Haplogroups B and C have been predominant mainly in  
74 Southeast Asian countries including Thailand (Chaichanasak et al., 2012), Myanmar  
75 (Ichikawa et al., 2011) and Indonesia (Hayashi et al., 2016). Haplogroup A has been  
76 distributed in the Indian subcontinent including East India (Hayashi et al., 2015), Bangladesh  
77 (Mohanta et al., 2014), Nepal (Shoriki et al., 2014) and Myanmar (Ichikawa et al., 2011). The  
78 zebu cattle (*Bos indicus*) and water buffalo (*Bubalus bubalis*) have been considered to be the  
79 definitive host of *F. gigantica* (Kikkawa et al., 2003). Hayashi et al. (2015) demonstrated that  
80 the haplogroup A of *F. gigantica* originated in the Indus River vally, and the unregulated  
81 animal movement might be involved in the spread of this parasite species. However, limited  
82 information is available on *F. gigantica* fluke in Pakistan to reveal the expansion history of  
83 this parasite through Indus River vally of the Indian subcontinent.

84 In this paper, we describe a study using liver flukes collected from buffalo and goat  
85 slaughtered in abattoirs in the Punjab province of Pakistan, with the following aims: i) to  
86 perform the species identification using the most reliable nuclear markers:  
87 phosphoenolpyruvate carboxykinase (*pepck*) and DNA polymerase delta (*pold*) genes  
88 (Shoriki et al., 2016); ii) to determine the propagation route of *F. gigantica* in the Indian

89 subcontinent using mitochondrial NADH dehydrogenase subunit 1 (*nad1*) and cytochrome C  
90 oxidase subunit 1 (*cox1*) genes.

91

## 92 **2. Materials and Methods**

### 93 *2.1. Sample collection and gDNA extraction*

94 A total of 14 *Fasciola* infected livers (7 buffalo and 7 goats) were collected from the  
95 animals slaughtered at the Punjab Agriculture & Meat Company (PAMCO) Lahore (31.4330°  
96 N, 74.1945° E). The livers were transported from abattoir to the laboratory on ice, where  
97 flukes were recovered from the biliary ducts by dissection. A total of 53 flukes (25 from 7  
98 buffalo and 28 from 7 goats) (Table 1) were thoroughly washed with phosphate-buffered  
99 saline (PBS), and preserved in 70% ethanol until use. A small portion of the vitelline glands  
100 from the posterior part of each fluke was used for DNA extraction using the High Pure DNA  
101 Extraction Kit (Roche, Mannheim, Germany) following the manufacturer's protocols, and  
102 stored at -20°C until further use.

103

### 104 *2.2. Multiplex PCR and PCR-RFLP of pepck and pold genes of Fasciola species*

105 The fragments of *pepck* were amplified through the multiplex PCR assay previously  
106 described by Shoriki et al. (2016). The PCR amplicons were run on 1.8% agarose gels for 30  
107 min to detect the *F. hepatica* (approximately 500bp), *F. gigantica* (approximately 240bp) or  
108 hybrid fragment patterns (both the fragments). The fragments of *pold* were analysed through  
109 the PCR-RFLP assay previously described by Shoriki et al. (2016). The PCR products were  
110 subsequently digested with *AluI* enzyme (Toyobo, Osaka, Japan) at 37 °C for three hours.  
111 The resultant products were run on 1.8% agarose gels for 30 min to detect the *F. hepatica*  
112 (approximately 700bp), *F. gigantica* (approximately 500bp) or hybrid fragment patterns (both  
113 the fragments).

114

### 115 *2.3. PCR amplification and sequencing of nad1 and cox1 genes*

116 The fragments of *nad1* (535bp) and *cox1* (430bp) genes were amplified through a PCR  
117 assay previously described by Itagaki et al. (2005). The PCR amplicons were purified using  
118 NucleoSpin Gel and PCR Clean-up Kit (Macherey-Nagel, Düren, Germany) and sequenced  
119 by Eurofin Genomics K.K. (Tokyo, Japan). The resultant DNA sequences were assembled  
120 using ATGC v. 6.0.3 (Genetyx Co., Tokyo, Japan) and the haplotypes were identified by  
121 GENETYX v. 10.0.2 (Genetyx Co.).

122

123 *2.3. Median-joining network and diversity indices of nad1 and cox1 genes*

124 Median-joining (MJ) network was constructed using Network v. 5.0.1.1 software (Tajima,  
125 1989) to determine the phylogenetic relationships among the *nad1* and *cox1* haplotypes.  
126 Median-joining (MJ) network has been further used to compare the *nad1* haplotypes of the  
127 present study with the reference *nad1* haplotypes of *F. gigantica* from India (Ichikawa and  
128 Itagaki, 2010a), Bangladesh (Mohanta et al., 2014), Nepal (Shoriki et al., 2014), Myanmar  
129 (Ichikawa et al., 2011), Thailand (Chaichanasak et al., 2012), Vietnam (Itagaki et al., 2009),  
130 Indonesia (Hayashi et al., 2016), China (Peng et al., 2009), Korea (Ichikawa and Itagaki,  
131 2012) and Japan (Itagaki et al., 2005). The reference *nad1* haplotypes were retrieved from the  
132 GenBank and their frequencies were referred from the previous reports.

133 The diversity indices, including the number of variable sites ( $S$ ), the number of haplotypes  
134 ( $h$ ), and the nucleotide diversity ( $\pi$ ) were calculated using DnaSP software v. 5.1 (Librado  
135 and Rozas, 2009). Tukey's test was performed by GraphPad Prism v. 7.04 (GraphPad  
136 Software Inc., San Diego, CA, USA) to detect the significant differences in  $\pi$  values among  
137 the populations. First, the samples of the present study were compared to each other to find  
138 the differences between buffalo and goat. In the next step, the indices of *nad1* were compared  
139 with those of the reference populations of *F. gigantica* from India (Hayashi et al., 2015),  
140 Bangladesh (Mohanta et al., 2014), Nepal (Shoriki et al., 2014) and Myanmar (Ichikawa et  
141 al., 2011) to find relationships between the neighbouring countries.

142 The pairwise fixation index ( $F_{ST}$ ) values between the *F. gigantica* samples derived from  
143 buffalo and goat were calculated using Arlequin program v. 3.5.2.2 (Loftus et al., 1994) to  
144 find genetic differences. If the  $F_{ST}$  values approaching 1 indicate extreme genetic  
145 differentiation between the two populations.

146

147 **Results**

148 *3.1. Species identification*

149 The fragment analysis by the multiplex PCR and the PCR-RFLP for *pepck* and *pold*  
150 showed that a total of 53 flukes collected from buffalo and goat were *F. gigantica* (Table 1).  
151 These results are complemented with the previous reports which suggest that *F. gigantica* is  
152 the predominant species in Punjab province of Pakistan (Chaudhry et al., 2016; Rehman et  
153 al., 2020).

154

155 *3.2. Mitochondrial haplotype distribution of F. gigantica between buffalo and goat*

156 The haplotype distribution was analysed separately for 53 individual *F. gigantica* flukes.  
157 A total of seventeen *nad1* haplotypes were detected in *F. gigantica* (Table 1). The MJ  
158 network revealed that PAK-nad1Fg1 and PAK-nad1Fg2 were the two predominant  
159 haplotypes present in both buffalo and goat (Fig. 1A) with four nucleotide substitutions  
160 between them. A total of seventeen *cox1* haplotypes were detected in *F. gigantica* (Table 1).  
161 The MJ network revealed that PAK-cox1Fg1 and PAK-cox1Fg2 were the predominant  
162 haplotypes found in both buffalo and goat (Fig. 1B), with three nucleotide substitutions  
163 between them.

164 The  $\pi$  for *nad1* and *cox1* were compared between *F. gigantica* samples acquired from  
165 both hosts. For the *nad1* gene, a higher  $\pi$  value was observed in the *F. gigantica* populations  
166 obtained from goat, but the result was opposite for the *cox1* gene (Table 2), and therefore,  
167 more diverse i.e. older population could not be determined. The  $F_{ST}$  values between the two  
168 hosts for both the genes (*nad1*: 0.12931, *cox1*: 0.16914) were statistically significant ( $P <$   
169 0.05), indicating the existence of genetic differentiation.

170

171 *3.3. Comparative analysis of F. gigantica with that from neighboring countries*

172 The MJ network analysis of seventeen *nad1* haplotypes revealed that PAK-nad1Fg2  
173 haplotype had an identical sequence with the *F. gigantica* haplotypes from India (ND1-E6),  
174 Nepal (Fg-ND1-N1), Myanmar (Fg-M15), Bangladesh (Fg-NDI-Bd9) and Thailand (Fg-  
175 ND1-Thai13) (Fig. 2). The PAK-nad1Fg9, 10, 11, 12, 14 and 15 haplotypes had a single or  
176 double nucleotide substitutions present nearly to the PAK-nad1Fg2 haplotype. The PAK-  
177 nad1Fg13 halotype had an identical sequence with the *F. gigantica* haplotypes from India  
178 (ND1-E7) and Myanmar (Fg-M16), and PAK-nad1Fg10 was identical to ND1-IN14  
179 haplotype from India (Fig. 2). In contrast, the remaining nine haplotypes including PAK-  
180 nad1Fg1 (a most dominated haplotype) were not related to any reference haplotypes from  
181 neighbouring countries (Fig. 2).

182 The  $\pi$  values for *nad1* were compared between *F. gigantica* samples from Pakistan and  
183 neighbouring countries. The data suggest that the *F. gigantica* of the present study had the  
184 highest  $\pi$  value among the populations (Table 3), implying a higher nucleotide diversity in  
185 Pakistani populations as compared to the neighbouring countries.

186

187 **Discussion**

188 Historically, it has been suggested that *F. gigantea* might originate and spread by zebu  
189 cattle (*Bos indicus*) and water buffalo (*Bubalus bubalis*) in the Indian subcontinent (Peng et  
190 al., 2009). The water buffalo was domesticated in the Indus River valley (modern-day  
191 Pakistan) at around 7,000 to 8,000 BC, whereas zebu cattle was domesticated in the Indus  
192 Valley, Near and Middle East and Eastern Europe around 5,000 years ago (Bradley et al.,  
193 1996; Loftus et al., 1994; Tanaka et al., 1996). Since Pakistan is a part of the Indian  
194 subcontinent, free movement of zebu cattle and water buffalo probably play a significant role  
195 in the spread of *F. gigantea* in the region. Over the past few decades, high levels of animal  
196 movement have been reported in domestic ruminants in the Indian subcontinent (Kelley et al.,  
197 2016; Vilas et al., 2012). The farmers rear multiple species of animals to meet their livelihood  
198 in this region (Devendra, 2007). The mixed farming system might play an important role in  
199 the spread of *F. gigantea*. The animal movement patterns differ between farms, and *F.*  
200 *gigantica* infects a wide range of hosts including domestic and wild animals. Therefore,  
201 human activities potentially enable the spread of this parasite (Rojo-Vázquez et al., 2012).  
202 Hence genetic analysis are needed to understand the corresponding origin and spread of *F.*  
203 *gigantica* infections, which aid in the development of parasite control strategies (Hayashi et  
204 al., 2016).

205 In the present study, a significant genetic differentiation between *F. gigantea* samples  
206 from buffalo and goat was suggested by the  $F_{ST}$  value, which might be due to the difference  
207 in host immunity (Haroun and Hillyer, 1986; Piedrafita et al., 2004; Roberts et al., 1997) or  
208 due to the variances in the geographical position of these two hosts in the Punjab province of  
209 Pakistan. Generally, the lowlands of Punjab are more prone to flooding and reported to be  
210 highly populated with buffalo, in comparison, goat are resided in higher areas or keep moving  
211 to different areas due to human travelling (Afshan et al., 2014). However, the expansion  
212 history of *F. gigantea* between the hosts could not be inferred in the present study; the older  
213 host in Punjab could not be determined since the opposite statistical differences were  
214 observed in the  $\pi$  values of *nadI* and *coxI*.

215 The current study revealed that at least two origins of *F. gigantea* in Pakistan with  
216 reference to the neighbouring countries. In haplogroup A, the eight *F. gigantea* haplotypes of  
217 the present study had a close relationship with the haplotypes from India, Bangladesh, Nepal,  
218 Myanmar and Thailand. The MJ network indicates that the haplotypes detected in India were  
219 apparently more diverse than Pakistan, which indicates the hypothesis of the expansion of

220 these haplotypes from India to Pakistan. In contrast, the nine Pakistani haplotypes were not  
221 shared with any neighbouring countries, suggesting an independent origin, or possibly come  
222 from neighbouring Middle East countries where genetic analysis of *F. gigantica* has never  
223 been conducted. Further studies from different areas of Pakistan, as well as neighbouring  
224 Middle East countries, will be required to reveal the origin and dispersal direction of these  
225 haplotypes.

226 In summary, the present study provides preliminary insights into the origin and spread of  
227 *F. gigantica* in Pakistan and the neighbouring countries of the Indian subcontinent. We have  
228 also described the genetic difference between *F. gigantica* populations derived from buffalo  
229 and goat. Overall, the study provides a benchmark and opens a new avenue for more detailed  
230 analysis in this region. It might be helpful to involve higher samples size, more host species  
231 from different areas to get more conclusive results of the genetic diversity of *F. gigantica*  
232 among buffalo, goat, sheep and cattle as well as their possible spread patterns in the country  
233 and the subcontinent.

234

### 235 **Acknowledgements**

236 The authors acknowledge Mr Zain Ali khan, Mr Obaid Mohammad Abdullah and Mr  
237 Muhammad Omer Gulzar for their support and participation during sample collection. This  
238 work was supported by a Grant-in-Aid for Scientific Research (B) from MEXT KAKENHI  
239 (Grant Number16H05806).

240

### 241 **Conflicts of interest**

242 The authors declare no conflicts of interest.

243

### 244 **Reference**

- 245 Afshan, K., Fortes-Lima, C.A., Artigas, P., Valero, M.A., Qayyum, M., Mas-Coma, S., 2014.  
246 Impact of climate change and man-made irrigation systems on the transmission risk,  
247 long-term trend and seasonality of human and animal fascioliasis in Pakistan.  
248 *Geospatial Health*, 317-334.
- 249 Aghayan, S., Gevorgian, H., Ebi, D., Atoyan, H.A., Addy, F., Mackenstedt, U., Romig, T.,  
250 Wassermann, M., 2019. *Fasciola* spp. in Armenia: Genetic diversity in a global  
251 context. *Veterinary parasitology* 268, 21-31.
- 252 Ai, L., Weng, Y., Elsheikha, H., Zhao, G., Alasaad, S., Chen, J., Li, J., Li, H., Wang, C.,  
253 Chen, M., 2011. Genetic diversity and relatedness of *Fasciola* spp. isolates from  
254 different hosts and geographic regions revealed by analysis of mitochondrial DNA  
255 sequences. *Veterinary parasitology* 181, 329-334.



- 256 Bradley, D.G., MacHugh, D.E., Cunningham, P., Loftus, R.T., 1996. Mitochondrial diversity  
257 and the origins of African and European cattle. *Proceedings of the National Academy*  
258 *of Sciences* 93, 5131-5135.
- 259 Chaichanasak, P., Ichikawa, M., Sobhon, P., Itagaki, T., 2012. Identification of *Fasciola*  
260 flukes in Thailand based on their spermatogenesis and nuclear ribosomal DNA, and  
261 their intraspecific relationships based on mitochondrial DNA. *Parasitol Int* 61, 545-  
262 549.
- 263 Chaudhry, U., Van Paridon, B., Shabbir, M., Shafee, M., Ashraf, K., Yaqub, T., Gilleard, J.,  
264 2016. Molecular evidence shows that the liver fluke *Fasciola gigantica* is the  
265 predominant *Fasciola* species in ruminants from Pakistan. *Journal of helminthology*  
266 90, 206-213.
- 267 Devendra, C., 2007. Small farm systems to feed hungry Asia. *Outlook on Agriculture* 36, 7-  
268 20.
- 269 Elliott, T., Muller, A., Brockwell, Y., Murphy, N., Grillo, V., Toet, H., Anderson, G.,  
270 Sangster, N., Spithill, T., 2014. Evidence for high genetic diversity of NAD1 and  
271 COX1 mitochondrial haplotypes among triclabendazole resistant and susceptible  
272 populations and field isolates of *Fasciola hepatica* (liver fluke) in Australia.  
273 *Veterinary parasitology* 200, 90-96.
- 274 Haroun, E., Hillyer, G.V., 1986. Resistance to fascioliasis--a review. *Veterinary parasitology*  
275 20, 63-93.
- 276 Hayashi, K., Ichikawa-Seki, M., Allamanda, P., Wibowo, P.E., Mohanta, U.K., Sodirun,  
277 Guswanto, A., Nishikawa, Y., 2016. Molecular characterization and phylogenetic  
278 analysis of *Fasciola gigantica* from western Java, Indonesia. *Parasitol Int* 65, 424-427.
- 279 Hayashi, K., Ichikawa-Seki, M., Mohanta, U.K., Singh, T.S., Shoriki, T., Sugiyama, H.,  
280 Itagaki, T., 2015. Molecular phylogenetic analysis of *Fasciola* flukes from eastern  
281 India. *Parasitology international* 64, 334-338.
- 282 Ichikawa-Seki, M., Tokashiki, M., Opara, M.N., Iroh, G., Hayashi, K., Kumar, U.M., Itagaki,  
283 T., 2017. Molecular characterization and phylogenetic analysis of *Fasciola gigantica*  
284 from Nigeria. *Parasitology international* 66, 893-897.
- 285 Ichikawa, M., Bawn, S., Maw, N.N., Htun, L.L., Thein, M., Gyi, A., Sunn, K., Katakura, K.,  
286 Itagaki, T., 2011. Characterization of *Fasciola* spp. in Myanmar on the basis of  
287 spermatogenesis status and nuclear and mitochondrial DNA markers. *Parasitology*  
288 *international* 60, 474-479.
- 289 Ichikawa, M., Itagaki, T., 2010a. Discrimination of the ITS1 types of *Fasciola* spp. based on a  
290 PCR-RFLP method. *Parasitology research* 106, 757-761.
- 291 Ichikawa, M., Itagaki, T., 2010b. Discrimination of the ITS1 types of *Fasciola* spp. based on  
292 a PCR-RFLP method. *Parasitology research* 106, 757-761.
- 293 Ichikawa, M., Itagaki, T., 2012. Molecular analysis of aspermic *Fasciola* flukes from Korea  
294 on the basis of the nuclear ITS1 region and mitochondrial DNA markers and  
295 comparison with Japanese aspermic *Fasciola* flukes. *Journal of Veterinary Medical*  
296 *Science*, 1203050785-1203050785.
- 297 Itagaki, T., Kikawa, M., Sakaguchi, K., Shimo, J., Terasaki, K., Shibahara, T., Fukuda, K.,  
298 2005. Genetic characterization of parthenogenic *Fasciola* sp. in Japan on the basis of  
299 the sequences of ribosomal and mitochondrial DNA. *Parasitology* 131, 679-685.
- 300 Itagaki, T., Sakaguchi, K., Terasaki, K., Sasaki, O., Yoshihara, S., Van Dung, T., 2009.  
301 Occurrence of spermic diploid and aspermic triploid forms of *Fasciola* in Vietnam and  
302 their molecular characterization based on nuclear and mitochondrial DNA. *Parasitol*  
303 *Int* 58, 81-85.

- 304 Kelley, J.M., Elliott, T.P., Beddoe, T., Anderson, G., Skuce, P., Spithill, T.W., 2016. Current  
305 threat of triclabendazole resistance in *Fasciola hepatica*. *Trends in parasitology* 32,  
306 458-469.
- 307 Kikkawa, Y., Takada, T., Sutopo, Nomura, K., Namikawa, T., Yonekawa, H., Amano, T.,  
308 2003. Phylogenies using mtDNA and SRY provide evidence for male-mediated  
309 introgression in Asian domestic cattle. *Animal genetics* 34, 96-101.
- 310 Librado, P., Rozas, J., 2009. DnaSP v5: a software for comprehensive analysis of DNA  
311 polymorphism data. *Bioinformatics* 25, 1451-1452.
- 312 Loftus, R.T., MacHugh, D.E., Bradley, D.G., Sharp, P.M., Cunningham, P., 1994. Evidence  
313 for two independent domestications of cattle. *Proceedings of the National Academy of*  
314 *Sciences* 91, 2757-2761.
- 315 Mas-Coma, S., 2003. Adaptation capacities of *Fasciola hepatica* and their relationships with  
316 human fascioliasis: from below sea level up to the very high altitude. *Taxonomy,*  
317 *ecology and evolution of metazoan parasites* 2, 81-123.
- 318 Mas-Coma, S., Bargues, M.D., Valero, M., 2005. Fascioliasis and other plant-borne  
319 trematode zoonoses. *International journal for parasitology* 35, 1255-1278.
- 320 Mas-Coma, S., Valero, M.A., Bargues, M.D., 2009. Chapter 2. *Fasciola*, lymnaeids and  
321 human fascioliasis, with a global overview on disease transmission, epidemiology,  
322 evolutionary genetics, molecular epidemiology and control. *Adv Parasitol* 69, 41-146.
- 323 Mohanta, U.K., Ichikawa-Seki, M., Shoriki, T., Katakura, K., Itagaki, T., 2014.  
324 Characteristics and molecular phylogeny of *Fasciola* flukes from Bangladesh,  
325 determined based on spermatogenesis and nuclear and mitochondrial DNA analyses.  
326 *Parasitology research* 113, 2493-2501.
- 327 Peng, M., Ichinomiya, M., Ohtori, M., Ichikawa, M., Shibahara, T., Itagaki, T., 2009.  
328 Molecular characterization of *Fasciola hepatica*, *Fasciola gigantica*, and aspermic  
329 *Fasciola* sp. in China based on nuclear and mitochondrial DNA. *Parasitology research*  
330 105, 809-815.
- 331 Piedrafita, D., Raadsma, H., Prowse, R., Spithill, T.W., 2004. Immunology of the host-  
332 parasite relationship in fasciolosis (*Fasciola hepatica* and *Fasciola gigantica*).  
333 *Canadian Journal of Zoology* 82, 233-250.
- 334 Rehman, Z.U., Zahid, O., Rashid, I., Ali, Q., Akbar, M.H., Oneeb, M., Shehzad, W., Ashraf,  
335 K., Sargison, N.D., Chaudhry, U., 2020. Genetic diversity and multiplicity of  
336 infection in *Fasciola gigantica* isolates of Pakistani livestock. *Parasitol Int* 76, 102071.
- 337 Roberts, J., Estuningsih, E., Widjayanti, S., Wiedosari, E., Partoutomo, S., Spithill, T., 1997.  
338 Resistance of Indonesian thin tail sheep against *Fasciola gigantica* and *F. hepatica*.  
339 *Veterinary Parasitology* 68, 69-78.
- 340 Rojo-Vázquez, F.A., Meana, A., Valcárcel, F., Martínez-Valladares, M., 2012. Update on  
341 trematode infections in sheep. *Veterinary parasitology* 189, 15-38.
- 342 Rokni, M.B., Mirhendi, H., Mizani, A., Mohebbi, M., Sharbatkhori, M., Kia, E.B., Abdoli,  
343 H., Izadi, S., 2010. Identification and differentiation of *Fasciola hepatica* and *Fasciola*  
344 *gigantica* using a simple PCR-restriction enzyme method. *Experimental parasitology*  
345 124, 209-213.
- 346 Sabourin, E., Alda, P., Vázquez, A., Hurtrez-Boussès, S., Vittecoq, M., 2018. Impact of  
347 human activities on fasciolosis transmission. *Trends in parasitology*.
- 348 Semyenova, S.K., Morozova, E.V., Chrisanfova, G.G., Gorokhov, V.V., Arkhipov, I.A.,  
349 Moskvina, A.S., Movsessyan, S.O., Ryskov, A.P., 2006. Genetic differentiation in  
350 eastern European and western Asian populations of the liver fluke, *Fasciola hepatica*,  
351 as revealed by mitochondrial nad1 and cox1 genes. *Journal of Parasitology* 92, 525-  
352 531.

- 353 Shoriki, T., Ichikawa-Seki, M., Devkota, B., Rana, H.B., Devkota, S.P., Humagain, S.K.,  
354 Itagaki, T., 2014. Molecular phylogenetic identification of *Fasciola* flukes in Nepal.  
355 *Parasitol Int* 63, 758-762.
- 356 Shoriki, T., Ichikawa-Seki, M., Suganuma, K., Naito, I., Hayashi, K., Nakao, M., Aita, J.,  
357 Mohanta, U.K., Inoue, N., Murakami, K., Itagaki, T., 2016. Novel methods for the  
358 molecular discrimination of *Fasciola* spp. on the basis of nuclear protein-coding  
359 genes. *Parasitology international* 65, 180-183.
- 360 Tajima, F., 1989. Statistical method for testing the neutral mutation hypothesis by DNA  
361 polymorphism. *Genetics* 123, 585-595.
- 362 Tanaka, K., Solis, C.D., Masangkay, J.S., Maeda, K., Kawamoto, Y., Namikawa, T., 1996.  
363 Phylogenetic relationship among all living species of the genus *Bubalus* based on  
364 DNA sequences of the cytochrome b gene. *Biochemical genetics* 34, 443-452.
- 365 Thang, T.N., Hakim, H., Rahimi, R.R., Ichikawa-Seki, M., 2019. Molecular analysis reveals  
366 expansion of *Fasciola hepatica* distribution from Afghanistan to China. *Parasitology*  
367 *international* 72, 101930.
- 368 Toledo, R., Fried, B., 2014. *Digenetic trematodes*, Vol 480. Springer.
- 369 Usip, L., Ibanga, E., Edoho, H., Amadi, E., Utah, E., 2014. Prevalence of Fascioliasis and the  
370 economic loss of condemned liver due to *Fasciola* infection in Cattle slaughtered at  
371 three abattoirs in Eket Urban, Akwa Ibom State of Nigeria. *Global Advanced*  
372 *Research Journal of Food Science and Technology* 3, 54-75.
- 373 Vilas, R., Vázquez-Prieto, S., Paniagua, E., 2012. Contrasting patterns of population genetic  
374 structure of *Fasciola hepatica* from cattle and sheep: implications for the evolution of  
375 anthelmintic resistance. *Infection, Genetics and Evolution* 12, 45-52.

376

## 377 **Figure Legend**

378

379 **Fig. 1:** Median-joining network based on the mitochondrial (A) *nadI* and (B) *coxI*  
380 haplotypes of *F. gigantica* from Pakistani origin. Each circle indicates a single haplotype.  
381 Black colour indicates the haplotypes from Buffalo and white colour haplotypes from the  
382 goat. Small circles are the median vectors needed to connect the haplotypes.

383

384 **Fig. 2:** Median-joining network based on the mitochondrial *nadI* haplotypes of *F. gigantica*  
385 in Pakistan and other countries. The *Fasciola* flukes from Pakistan are shown in black colour.  
386 Each circle indicates a single haplotype. Small circles are the median vectors which are  
387 needed to connect the haplotypes. The haplotype codes are shown within or adjacent to the  
388 circles. Numbers on each circle and node indicate the number of flukes and the number of  
389 substitution sites, respectively.

(A)

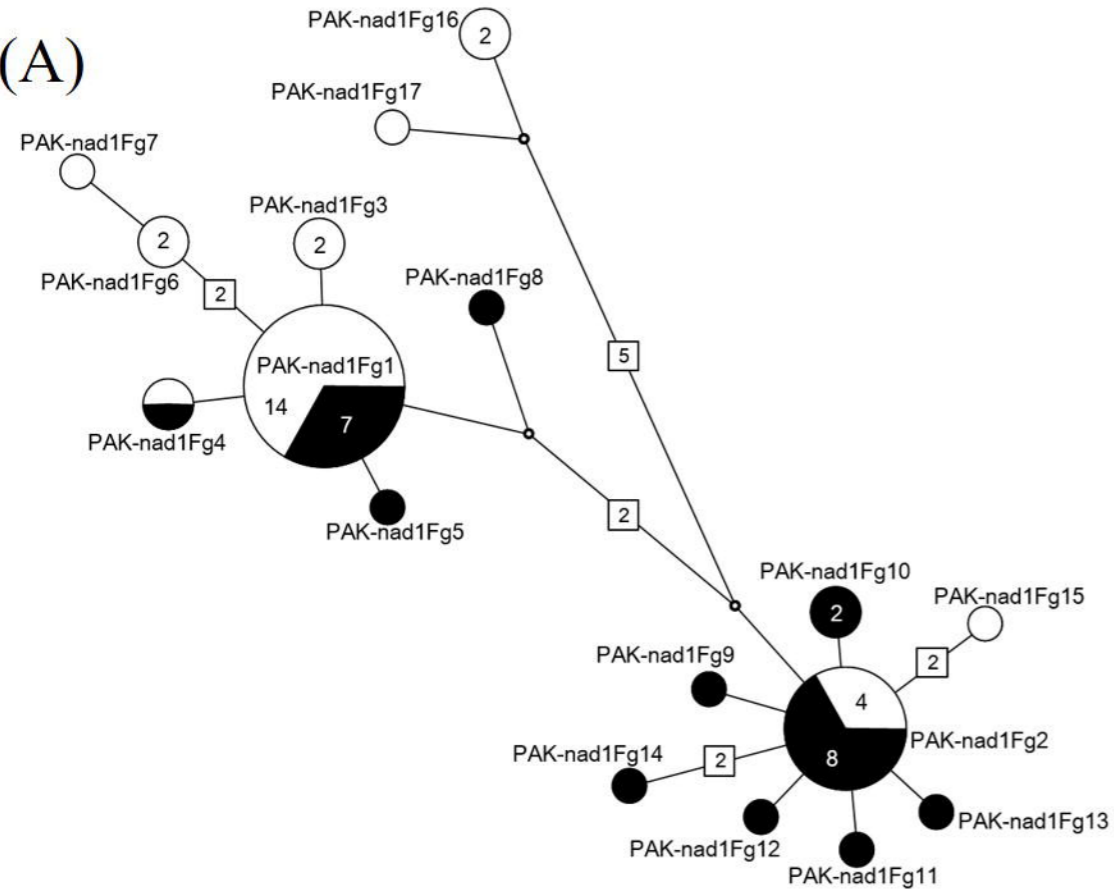

(B)

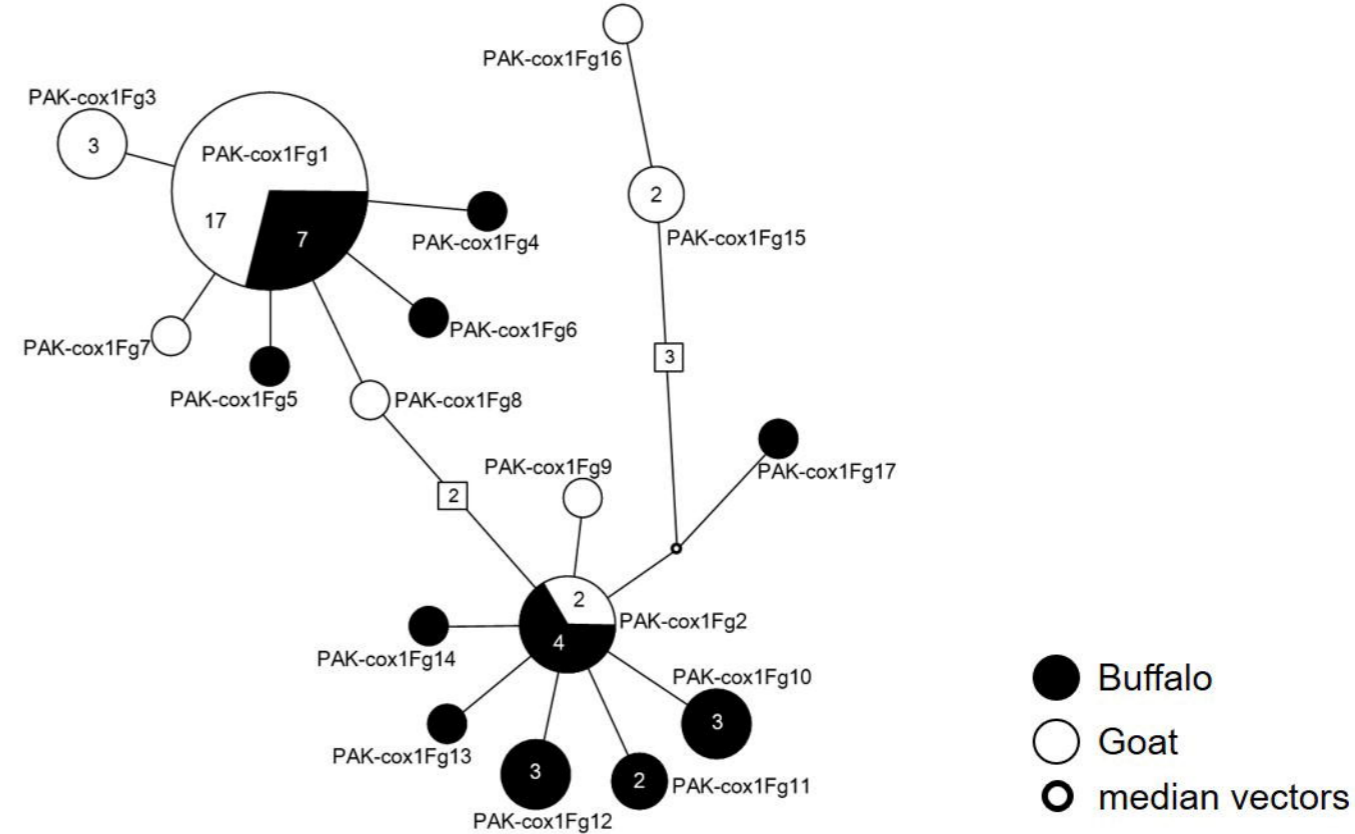

- Buffalo
- Goat
- ◐ median vectors



**Table 1:** Profiles of *Fasciola* flukes used in this study.

| Host ID         | Host species | Number of flukes | Nuclear DNA  |             | Mitochondrial DNA |               |              | species  |                     |
|-----------------|--------------|------------------|--------------|-------------|-------------------|---------------|--------------|----------|---------------------|
|                 |              |                  | <i>pepck</i> | <i>pold</i> | <i>nad1</i>       | Accession No. | <i>cox1</i>  |          | Accession No.       |
| B8              | Buffalo      | 4                | Fg           | Fg          | PAK-nad1Fg2       | LC517886      | PAK-cox1Fg17 | LC520088 | <i>F. gigantica</i> |
|                 |              |                  | Fg           | Fg          | PAK-nad1Fg11      | LC517895      | PAK-cox1Fg12 | LC517913 | <i>F. gigantica</i> |
|                 |              |                  | Fg           | Fg          | PAK-nad1Fg12      | LC517896      | PAK-cox1Fg13 | LC517914 | <i>F. gigantica</i> |
|                 |              |                  | Fg           | Fg          | PAK-nad1Fg2       | LC517886      | PAK-cox1Fg2  | LC517903 | <i>F. gigantica</i> |
| B10             | Buffalo      | 4                | Fg           | Fg          | PAK-nad1Fg5       | LC517889      | PAK-cox1Fg5  | LC517906 | <i>F. gigantica</i> |
|                 |              |                  | Fg           | Fg          | PAK-nad1Fg10      | LC517894      | PAK-cox1Fg2  | LC517903 | <i>F. gigantica</i> |
|                 |              |                  | Fg           | Fg          | PAK-nad1Fg1       | LC517885      | PAK-cox1Fg1  | LC517902 | <i>F. gigantica</i> |
|                 |              |                  | Fg           | Fg          | PAK-nad1Fg1       | LC517885      | PAK-cox1Fg6  | LC517907 | <i>F. gigantica</i> |
| B11             | Buffalo      | 4                | Fg           | Fg          | PAK-nad1Fg8       | LC517892      | PAK-cox1Fg4  | LC517905 | <i>F. gigantica</i> |
|                 |              |                  | Fg           | Fg          | PAK-nad1Fg14      | LC517898      | PAK-cox1Fg12 | LC517913 | <i>F. gigantica</i> |
|                 |              |                  | Fg           | Fg          | PAK-nad1Fg1       | LC517885      | PAK-cox1Fg1  | LC517902 | <i>F. gigantica</i> |
|                 |              |                  | Fg           | Fg          | PAK-nad1Fg4       | LC517888      | PAK-cox1Fg1  | LC517902 | <i>F. gigantica</i> |
| B15             | Buffalo      | 4                | Fg           | Fg          | PAK-nad1Fg2       | LC517886      | PAK-cox1Fg12 | LC517913 | <i>F. gigantica</i> |
|                 |              |                  | Fg           | Fg          | PAK-nad1Fg10      | LC517894      | PAK-cox1Fg2  | LC517903 | <i>F. gigantica</i> |
|                 |              |                  | Fg           | Fg          | PAK-nad1Fg2       | LC517886      | PAK-cox1Fg11 | LC517912 | <i>F. gigantica</i> |
|                 |              |                  | Fg           | Fg          | PAK-nad1Fg2       | LC517886      | PAK-cox1Fg10 | LC517911 | <i>F. gigantica</i> |
| B16             | Buffalo      | 4                | Fg           | Fg          | PAK-nad1Fg1       | LC517885      | PAK-cox1Fg1  | LC517902 | <i>F. gigantica</i> |
|                 |              |                  | Fg           | Fg          | PAK-nad1Fg1       | LC517885      | PAK-cox1Fg1  | LC517902 | <i>F. gigantica</i> |
|                 |              |                  | Fg           | Fg          | PAK-nad1Fg1       | LC517885      | PAK-cox1Fg1  | LC517902 | <i>F. gigantica</i> |
|                 |              |                  | Fg           | Fg          | PAK-nad1Fg1       | LC517885      | PAK-cox1Fg1  | LC517902 | <i>F. gigantica</i> |
| B24             | Buffalo      | 2                | Fg           | Fg          | PAK-nad1Fg2       | LC517886      | PAK-cox1Fg10 | LC517911 | <i>F. gigantica</i> |
|                 |              |                  | Fg           | Fg          | PAK-nad1Fg2       | LC517886      | PAK-cox1Fg10 | LC517911 | <i>F. gigantica</i> |
| B29             | Buffalo      | 3                | Fg           | Fg          | PAK-nad1Fg2       | LC517886      | PAK-cox1Fg14 | LC517915 | <i>F. gigantica</i> |
|                 |              |                  | Fg           | Fg          | PAK-nad1Fg13      | LC517897      | PAK-cox1Fg2  | LC517903 | <i>F. gigantica</i> |
|                 |              |                  | Fg           | Fg          | PAK-nad1Fg9       | LC517894      | PAK-cox1Fg11 | LC517912 | <i>F. gigantica</i> |
| <b>Subtotal</b> | <b>7</b>     | <b>25</b>        |              |             |                   |               |              |          |                     |
| G1              | Goat         | 4                | Fg           | Fg          | PAK-nad1Fg3       | LC515887      | PAK-cox1Fg1  | LC517902 | <i>F. gigantica</i> |
|                 |              |                  | Fg           | Fg          | PAK-nad1Fg1       | LC517885      | PAK-cox1Fg1  | LC517902 | <i>F. gigantica</i> |
|                 |              |                  | Fg           | Fg          | PAK-nad1Fg4       | LC517888      | PAK-cox1Fg1  | LC517902 | <i>F. gigantica</i> |
|                 |              |                  | Fg           | Fg          | PAK-nad1Fg1       | LC517885      | PAK-cox1Fg1  | LC517902 | <i>F. gigantica</i> |
| G2              | Goat         | 4                | Fg           | Fg          | PAK-nad1Fg2       | LC517886      | PAK-cox1Fg1  | LC517902 | <i>F. gigantica</i> |
|                 |              |                  | Fg           | Fg          | PAK-nad1Fg1       | LC517885      | PAK-cox1Fg1  | LC517902 | <i>F. gigantica</i> |
|                 |              |                  | Fg           | Fg          | PAK-nad1Fg2       | LC517886      | PAK-cox1Fg2  | LC517903 | <i>F. gigantica</i> |
|                 |              |                  | Fg           | Fg          | PAK-nad1Fg2       | LC517886      | PAK-cox1Fg9  | LC517010 | <i>F. gigantica</i> |
| G3              | Goat         | 4                | Fg           | Fg          | PAK-nad1Fg1       | LC517885      | PAK-cox1Fg1  | LC517902 | <i>F. gigantica</i> |
|                 |              |                  | Fg           | Fg          | PAK-nad1Fg6       | LC517890      | PAK-cox1Fg1  | LC517902 | <i>F. gigantica</i> |
|                 |              |                  | Fg           | Fg          | PAK-nad1Fg2       | LC517886      | PAK-cox1Fg2  | LC517903 | <i>F. gigantica</i> |
|                 |              |                  | Fg           | Fg          | PAK-nad1Fg1       | LC517885      | PAK-cox1Fg1  | LC517902 | <i>F. gigantica</i> |
| G4              | Goat         | 4                | Fg           | Fg          | PAK-nad1Fg1       | LC517885      | PAK-cox1Fg1  | LC517902 | <i>F. gigantica</i> |
|                 |              |                  | Fg           | Fg          | PAK-nad1Fg15      | LC517899      | PAK-cox1Fg1  | LC517902 | <i>F. gigantica</i> |
|                 |              |                  | Fg           | Fg          | PAK-nad1Fg1       | LC517885      | PAK-cox1Fg1  | LC517902 | <i>F. gigantica</i> |
|                 |              |                  | Fg           | Fg          | PAK-nad1Fg6       | LC517890      | PAK-cox1Fg1  | LC517902 | <i>F. gigantica</i> |
| G5              | Goat         | 4                | Fg           | Fg          | PAK-nad1Fg1       | LC517885      | PAK-cox1Fg3  | LC517904 | <i>F. gigantica</i> |
|                 |              |                  | Fg           | Fg          | PAK-nad1Fg1       | LC517885      | PAK-cox1Fg7  | LC517908 | <i>F. gigantica</i> |

|                 |           |           |    |    |              |          |              |          |                    |
|-----------------|-----------|-----------|----|----|--------------|----------|--------------|----------|--------------------|
|                 |           |           | Fg | Fg | PAK-nad1Fg1  | LC517885 | PAK-cox1Fg3  | LC517904 | <i>F. gigantea</i> |
|                 |           |           | Fg | Fg | PAK-nad1Fg1  | LC517885 | PAK-cox1Fg3  | LC517904 | <i>F. gigantea</i> |
| G6              | Goat      | 4         | Fg | Fg | PAK-nad1Fg7  | LC517891 | PAK-cox1Fg1  | LC517902 | <i>F. gigantea</i> |
|                 |           |           | Fg | Fg | PAK-nad1Fg3  | LC515887 | PAK-cox1Fg15 | LC517916 | <i>F. gigantea</i> |
|                 |           |           | Fg | Fg | PAK-nad1Fg1  | LC517885 | PAK-cox1Fg8  | LC517909 | <i>F. gigantea</i> |
|                 |           |           | Fg | Fg | PAK-nad1Fg1  | LC517885 | PAK-cox1Fg1  | LC517902 | <i>F. gigantea</i> |
| G7              | Goat      | 4         | Fg | Fg | PAK-nad1Fg16 | LC517900 | PAK-cox1Fg1  | LC517902 | <i>F. gigantea</i> |
|                 |           |           | Fg | Fg | PAK-nad1Fg16 | LC517900 | PAK-cox1Fg15 | LC517916 | <i>F. gigantea</i> |
|                 |           |           | Fg | Fg | PAK-nad1Fg1  | LC517885 | PAK-cox1Fg1  | LC517902 | <i>F. gigantea</i> |
|                 |           |           | Fg | Fg | PAK-nad1Fg17 | LC517901 | PAK-cox1Fg16 | LC517917 | <i>F. gigantea</i> |
| <b>Subtotal</b> | <b>7</b>  | <b>28</b> |    |    |              |          |              |          |                    |
| <b>Total</b>    | <b>14</b> | <b>53</b> |    |    |              |          |              |          |                    |

**Table 2:** Diversity indices of *F. gigantica* populations based on the nucleotide sequences of mitochondrial markers.

| Gene        | Host    | <i>N</i> | <i>S</i> | <i>h</i> | $\pi$   | <i>SD</i> |
|-------------|---------|----------|----------|----------|---------|-----------|
| <i>nad1</i> | Buffalo | 25       | 14       | 11       | 0.00533 | 0.00049   |
|             | Goat    | 28       | 17       | 9        | 0.00668 | 0.00135   |
| <i>cox1</i> | Buffalo | 25       | 12       | 11       | 0.00612 | 0.00047   |
|             | Goat    | 28       | 10       | 8        | 0.00493 | 0.00125   |

*N*: number of flukes accessed; *S*: number of variable sites; *h*: number of haplotypes;  $\pi$ : nucleotide diversity. All values were statistically significant ( $P < 0.05$ ).



Table 3 Diversity indices of *F. gigantica* within haplogroup A based on the nucleotide sequences of nad1 gene.

| Countries  | <i>N</i> | <i>S</i> | <i>h</i> | $\pi$    | <i>SD</i> |
|------------|----------|----------|----------|----------|-----------|
| Pakistan   | 53       | 26       | 17       | 0.00650  | 0.00071   |
| India      | 132      | 41       | 43       | 0.00252* | 0.00023   |
| Bangladesh | 21       | 14       | 10       | 0.00312  | 0.00075   |
| Nepal      | 20       | 16       | 10       | 0.00366  | 0.00088   |
| Myanmar    | 13       | 7        | 6        | 0.00225* | 0.00072   |

*N*: number of flukes accessed; *S*: number of variable sites; *h*: number of haplotypes;  $\pi$ : nucleotide diversity; *SD*: standard deviation; \*: Statistically non-significant between the identical letter ( $P > 0.05$ ), others were significant ( $P < 0.05$ ).

*F. gigantica* from Thailand ( $n = 1$ ) and Indonesia ( $n = 1$ ) in haplogroupA was excluded from the calculation.
